# Supplementary material
Source: HighWire-hosted journal article supplement (https://bmjopenrespres.bmj.com/content/7/1/e000557)
Supplement: inline-supplementary-material-3 [file inline-supplementary-material-3.xlsx]

## Sheet: Sheet1
GENERAL INFORMATION																								INTERVENTION DETAILS									LABS
																																	pH							pO2							pCO2
																																	AZM			Placebo			Mean Difference	AZM			Placebo			Mean Difference	AZM
RefID	Author_Year	Year	Source	Condition	AMS/CMS	OSA/CSA	Ophtalmologic Condition	Ocular Surgery	Other	High Altitude	Design	Wash-out Days	% Females	Mean Age	Min Age	Max Age	Mean BMI	Mean Weight (kg)	Mean Height (cm)	% White	% Black	% Other	Diuretics	Total Daily Dose (reported)	Total Daily Dose (+estimates)	Doses/Day	Total Daily Dose/kg (reported)	Total Daily Dose/kg (+estimates)	AZM Days	Kumulative Dose (Total Daily Dose X AZM Days)	Renal Adjustment	K Supplementation	N	Mean	SD	N	Mean	SD	(AZM-Control)	N	Mean	SD	N	Mean	SD	(AZM-Control)	N	Mean	SD
2	Sharma 2017	2017	MEDLINE	CMS	Yes	No	No	No	No	Yes	Parallel		0	46.6									Unclear/No	250	250	1			42	10500	No	No	15	7.3	0.06	17	7.4	0.03	-0.1	15	45.1	6.4	17	41.1	6.9	4	15	30.4	4.56
4	Hamidi 2017	2017	MEDLINE	Dysuria	No	No	No	No	Yes	No	Parallel		46	49.2									Unclear/No	500	500	2			30	15000	No	No
14	tenHove 2016	2016	MEDLINE	IIH	No	No	No	No	Yes	No	Parallel		97.7	28.2			40	108.1		62.8	29.1	8.1	Unclear/No	2500	2500	2		23	180	450000	No	No
17	Bala 2015	2015	MEDLINE	Post-laparaoscopy	No	No	No	No	Yes	No	Parallel		85	40.1				60.5					Unclear/No		302.5	1	5	5	1	302.5	Yes	No
29	Ulrich 2015	2015	MEDLINE	pHTN	No	No	No	No	Yes	No	Cross-Over	7	65.2	66			26.6						Unclear/No	500	500	2		6.9	3	1500	No	No	23	7.35	0.0296296	23	7.43	0.0296296	-0.08	23	65.25	7.77778	23	58.5	8.88889	6.75	23	29.25	3.88889
31	Ke 2013	2013	MEDLINE	AMS	Yes	No	No	No	No	Yes	Parallel		0	19.2	17	22	21	61	170.4				Unclear/No	250	250	2		4.1	4	1000	Yes	No
32	Gulsvik 2013	2013	MEDLINE	Acute Respiratory Failue + metabolic alkalosis	No	No	No	No	Yes	No	Parallel		66	73.5									Yes	750	750	3			5	3750	No	No	35	7.337	0.052	35	7.423	0.039	-0.086	35	52.425	9.75	34	51.675	9.975	0.75	35	56.625	12
35	Latshang 2012 (1630m)	2012	MEDLINE	OSA	No	Yes	No	No	No	No	Cross-Over	14	5.7	63	37	75	33	96.1	na				Yes	750	750	2		7.8	3	2250	No	No															51	42	5.92593
40	Nussbaumer 2012 (1860M)	2012	MEDLINE	OSA	No	Yes	No	No	No	No	Cross-Over	14	6.7	64			31.7	93.1					Yes	500	500	1		5.4	3	1500	Yes	No															17	36	2.22222
49	Van Patot 2008	2008	MEDLINE	AMS	Yes	No	No	No	No	Yes	Parallel		42	22.9	18	37	26	79.9	174.1				Unclear/No	250	250	2		3.1	4	1000	No	No
51	Richalet 2008	2008	MEDLINE	CMS	Yes	No	No	No	No	Yes	Parallel		0	45			25.1						Unclear/No	250	250	1		3.7	90	22500	Yes	No	34	7.44	0.04	13	7.46	0.02	-0.02	34	45	4	13	41	4	4	34	26	3
56	Hillenbrand 2006	2006	MEDLINE	AMS	Yes	No	No	No	No	Yes	Parallel		0	25	18	54	20	51	160				Unclear/No	250	250	1		4.9	7	1750	No	No
58	Basnyat 2006 (250mg)	2006	MEDLINE	AMS	Yes	No	No	No	No	Yes	Parallel		34.3	36.8									Unclear/No	250	250	2			6	1500	Yes	No
58	Basnyat 2006 (750mg)	2006	MEDLINE	AMS	Yes	No	No	No	No	Yes	Parallel		46.3	38.9									Unclear/No	750	750	2			6	4500	Yes	No
62	Javaheri 2006	2006	MEDLINE	CSA	No	Yes	No	No	No	No	Cross-Over	14	0	55			26						Yes		276.7	1	4	4	6	1660.2	Yes	Standing	12	7.36151	4.67669	12	7.43063	0.0326861	-0.0691153	12	92	3	12	84	9	8	12	34.2	2.7
63	Richalet 2005 (250mg)	2005	MEDLINE	CMS	Yes	No	No	No	No	Yes	Parallel		0	43				65	162				Unclear/No	250	250	1		3.9	21	5250	No	No	9	7.36	0.05	5	7.43	0.02	-0.07	9	51.5	1.8	5	50.8	2.1	0.7	9	25.5	1.8
63	Richalet 2005 (500mg)	2005	MEDLINE	CMS	Yes	No	No	No	No	Yes	Parallel		0	41				67	160				Unclear/No	500	500	1		7.5	21	10500	No	No	9	7.32	0.09	5	7.43	0.02	-0.11	9	51.9	1.3	5	50.8	2.1	1.1	9	25	1.1
65	Chow 2005	2005	MEDLINE	AMS	Yes	No	No	No	No	Yes	Parallel		35	32	24	42							Unclear/No	500	500	2			2	1000	No	No
70	Gertsch 2004	2004	MEDLINE	AMS	Yes	No	No	No	No	Yes	Parallel		35.2	36.4									Unclear/No	500	500	2			2.5	1250	No	No
72	Fischer 2004	2004	MEDLINE	AMS/CSA	Yes	No	No	No	No	Yes	Parallel		0										Unclear/No	500	500	2			5	2500	Yes	No	10	7.39	0.02	10	7.45	0.02	-0.06	10	60.75	12	10	52.5	5.25	8.25	10	26.25	1.5
80	Basnyat 2003	2003	MEDLINE	AMS	Yes	No	No	No	No	Yes	Parallel		35.1	35.8									Unclear/No	250	250	2			2.5	625	No	No
83	Vahedi 2002	2002	MEDLINE	Migraines	No	No	No	No	Yes	No	Parallel		80.8	40	19	60		64	164				Unclear/No	500	500	2		7.8	90	45000	No	As needed
85	Gunal 2000	2000	MEDLINE	Essential Tremor	No	No	No	No	Yes	No	Cross-Over	14	79	51.5	18	83							Unclear/No	562	562	3			30	16860	No	No
90	Moldow 1998	1998	MEDLINE	Retinitis Pigmentosa	No	No	Yes	No	No	No	Cross-Over	14	44.4	38.7	24	63							Unclear/No	500	500	2			14	7000	No	No
96	Ladas 1997	1997	MEDLINE	Ocular Surgery (to pevent periop-IOP rise)	No	No	No	Yes	No	No	Parallel		55.7	67.2	48	86							Unclear/No	250	250	1			1	250	No	No
102	Whitcup 1996	1996	MEDLINE	Macular edema	No	No	Yes	No	No	No	Cross-Over	30	59.5	41	13	74				70	19	11	Unclear/No	1000	1000	2			30	30000	Yes	No
107	Vos 1994	1994	MEDLINE	COPD	No	No	No	No	Yes	No	Parallel		35.3	64			23						Unclear/No	500	500	2		8	7	3500	No	No	17	7.35	0.04	18	7.4	0.04	-0.05	17	70.5	10.5	18	60	6.75	10.5	17	44.25	9.75
109	Farber 1994	1994	MEDLINE	Chronic Iridocyclitits	No	No	Yes	No	No	No	Cross-Over	30	76.7	50.1	26	76				63.3	30	6.7	Unclear/No	1000	1000	2			30	30000	Yes	No
110	Ladas 1993	1993	MEDLINE	Ocular Surgery (to pevent periop-IOP rise)	No	No	No	Yes	No	No	Parallel		57.1	69	48	85							Unclear/No	125	125	1			1	125	No	No
112	Grissom 1992	1992	MEDLINE	AMS	Yes	No	No	No	No	Yes	Parallel		8.3	29.5	25	46							Unclear/No	500	500	2			1	500	No	No
118	Fishman 1989	1989	MEDLINE	Retinitis Pigmentosa	No	No	Yes	No	No	No	Cross-Over	14	75	45	29	79							Unclear/No	500	500	1			14	7000	No	No
119	Metcalfe 1989	1989	MEDLINE	Ocular Surgery (to pevent periop-IOP rise)	No	No	No	Yes	No	No	Parallel		54	74						100	0	0	Unclear/No	500	500	1			1	500	No	No
121	Whyte 1988	1988	MEDLINE	OSA	No	Yes	No	No	No	No	Cross-Over	14	20	51.5	34	67							Unclear/No	1000	1000	4			14	14000	No	No	10	7.36	0.04	10	7.42	0.04	-0.06
128	Häcki 1983	1983	MEDLINE	COPD	No	No	No	No	Yes	No	Cross-Over	3											Yes	500	500	2			6	3000	No	No
129	Larson 1982	1982	MEDLINE	AMS	Yes	No	No	No	No	Yes	Parallel		12.9	28.7									Unclear/No	750	750	3			2	1500	No	No
131	Greene 1981	1981	MEDLINE	AMS	Yes	No	No	No	No	Yes	Cross-Over	4	8.3	32.6	17	50							Unclear/No	500	500	1			5	2500	No	No
132	BMRESMSSG 1981	1981	MEDLINE	AMS	Yes	No	No	No	No	Yes	Parallel		0		20	52				100	0	0	Unclear/No	500	500	1			10	5000	No	No
360	Collier 2016 (Study #3)	2016	EMBASE	Healthy Volunteers	No	No	No	No	Yes	No	Cross-Over	7			18	32							Unclear/No	500	500	1			1	500	Yes	No
403	Reinhart 1994	1994	EMBASE	AMS	Yes	No	No	No	No	Yes	Parallel		44.4	30.9	24	42							Unclear/No	500	500	2			2.5	1250	Yes	No	9	7.33	0.01	9	7.4	0.03	-0.07								9	41.4	2.6
408	Rosenbaek 2018	2018	EMBASE	Healthy Volunteers	No	No	No	No	Yes	No	Cross-Over	21	68.8	23			23						Unclear/No	500	500	2		8	4.5	2250	Yes	No															16	18.4	1.40741
448	Utz 1970	1970	OTHER	AMS	Yes	No	No	No	No	Yes	Parallel		35.7	31.9	27	41							Unclear/No	750	750	3			3.5	2625	No	Standing
449	Zell 1988	1988	OTHER	AMS	Yes	No	No	No	No	Yes	Parallel		37.5		18	49							Unclear/No	500	500	2			4	2000	No	No
[truncated: 117 more columns]
